# Supplementary material
Source: PubMed Central journal article supplement (PMC5377494)
Supplement: AEM.00051-17_zam999117779s1.pdf [file AEM.00051-17_zam999117779s1.pdf]

1 **Suppl. Table 1.** Chemical shift values for the siderophore product ornibactin

| Residue                                            | <sup>1</sup> H | <sup>13</sup> C | Residue                                            | <sup>1</sup> H         | <sup>13</sup> C |
|----------------------------------------------------|----------------|-----------------|----------------------------------------------------|------------------------|-----------------|
| HOA-C-2                                            | 2.67/2.47      | 42.56           | Ser <sup>3</sup> -NH                               | 8.05                   |                 |
| HOA-C-3                                            | 3.98           | 71.42           | Ser <sup>3</sup> -C $\alpha$                       | 4.33                   | -               |
| HOA-C-4                                            | 1.45/1.36      | 39.91           | Ser <sup>3</sup> -C $\beta$                        | 3.82/3.75              | 64.13           |
| HOA-C-5                                            | 1.25           | 34.58           | Orn <sup>4</sup> (N $\delta$ -OH)-NH <sup>3+</sup> | 8.14/8.04              |                 |
| HOA-C-6                                            | 1.25           | 28.13           | Orn <sup>4</sup> (N $\delta$ -OH)-C $\alpha$       | 4.20/4.18              | 52.74           |
| HOA-C-7                                            | 1.25           | 25.48           | Orn <sup>4</sup> (N $\delta$ -OH)-C $\beta$        | 1.68/1.60<br>1.73/1.66 | 25.54<br>22.87  |
| HOA-C-8                                            | 0.85           | 16.65           | Orn <sup>4</sup> (N $\delta$ -OH)-C $\gamma$       | 1.68/1.60<br>1.83/1.74 | 30.85           |
| Orn <sup>1</sup> (N $\delta$ -OH)-NH <sup>3+</sup> | -              | -               | Orn <sup>4</sup> (N $\delta$ -OH)-C $\delta$       | 3.48/3.17              | 53.14           |
| Orn <sup>1</sup> (N $\delta$ -OH)-C $\alpha$       | 4.08           | 56.09           | N $\delta$ -formyl                                 |                        |                 |
| Orn <sup>1</sup> (N $\delta$ -OH)-C $\beta$        | 1.55           | 24.33           | Put-NH                                             | 7.77                   |                 |
| Orn <sup>1</sup> (N $\delta$ -OH)-C $\gamma$       | 1.77           | 31.25           | Put-C-1                                            | 3.14                   | 41.79           |
| Orn <sup>1</sup> (N $\delta$ -OH)-C $\delta$       | 3.74/3.47      | 50.23           | Put-C-2                                            | 1.47                   | 28.65           |
| Asp <sup>2</sup> ( $\beta$ -OH)-NH                 | 8.57           | -               | Put-C-3                                            | 1.53                   | 27.36           |
| Asp <sup>2</sup> ( $\beta$ -OH)-C $\alpha$         | 4.89           | 59.70           | Put-C-4                                            | 2.88                   | 42.56           |
| Asp <sup>2</sup> ( $\beta$ -OH)-C $\beta$          | 4.60           | 74.38           | Put-NH <sup>3+</sup>                               | 7.42                   |                 |

2

3

4

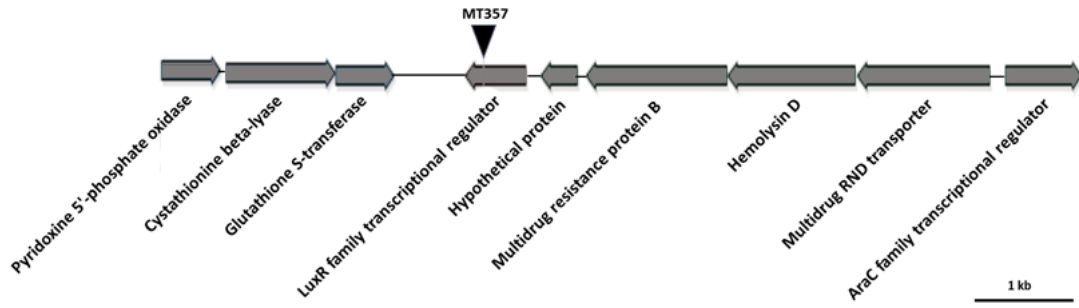

5

6 **Suppl. Fig. 1.** A 10-Kb genomic region of *Burkholderia contaminans* strain MS14 with  
7 the mutation location 357. The vertical arrow indicates the location of the transposon in  
8 the mutant MT357.

9



16

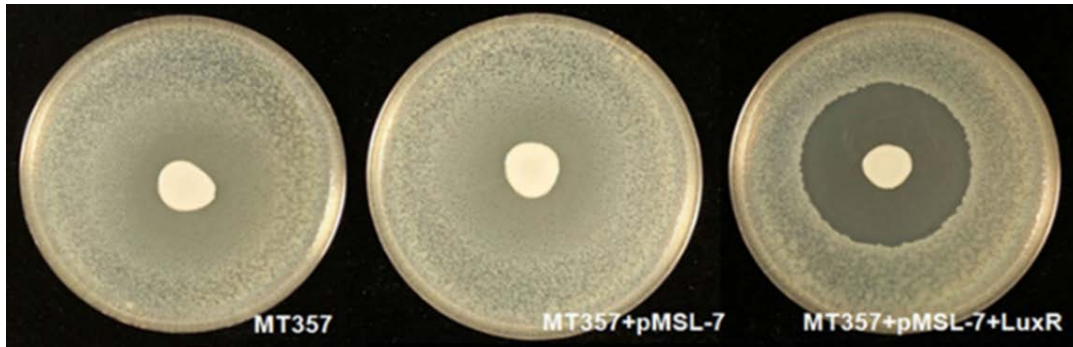

17

18

19 **Suppl. Fig. 3.** Constitutive expression of the *LuxR* homolog gene could restore the  
20 antibacterial activity against *E. amylovora*. A 5- $\mu$ l aliquot of bacterial suspension  
21 ( $OD_{420}=0.3$ ) was inoculated onto the center of NBY plates. After the plates were incubated  
22 for 3 days at 28°C, the NBY plates were oversprayed with suspension of the indicator  
23 bacterium *E. amylovora* ( $OD_{420}=0.3$ ). The inhibition zone is the indicator of antibacterial  
24 activity. MT357: the *LuxR* mutant; MT357+pMSL-7: MT375 containing the empty vector  
25 pMSL-7; and MT357+pMSL-7+LuxR: MT357 contacting the plasmid pDP357-2 with a  
26 functional *luxR*.

27

28

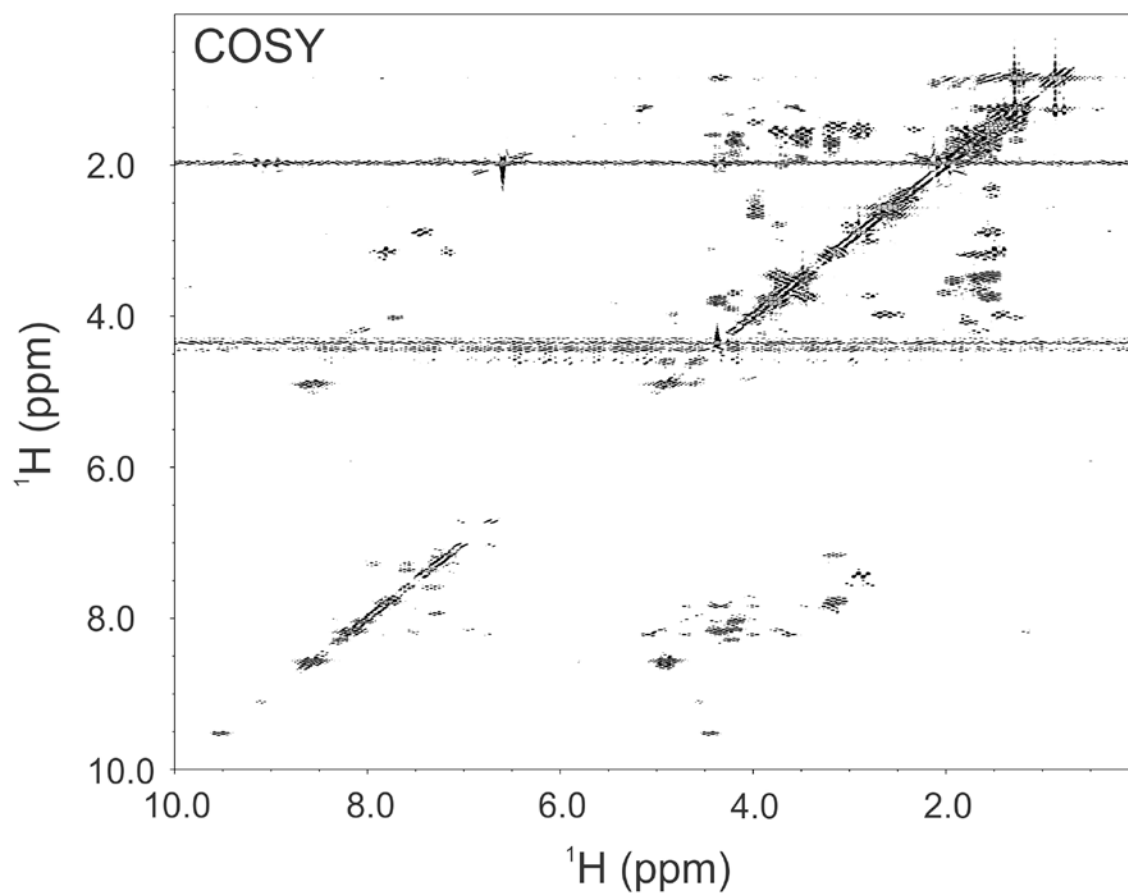

30

31 **Suppl. Fig. 4.** COSY60 NMR Spectrum of Ornibactin recorded at 600 MHz in (50:50)32 acetonitrile- $\text{d}_3$ .

33

34

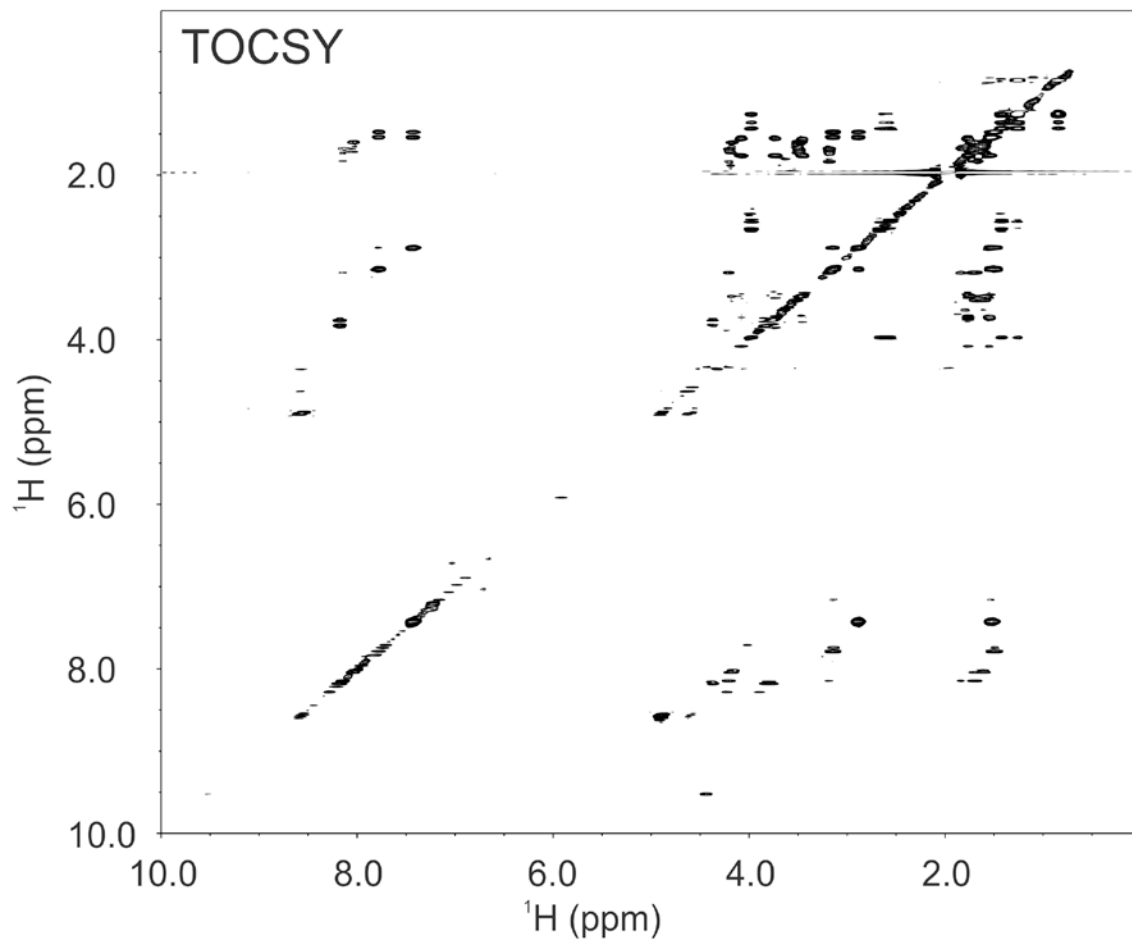

35

36 **Suppl. Fig. 5.** TOCSY60 NMR Spectrum of Ornibactin recorded at 600 MHz in (50:50)

37 acetonitrile- $d_3$ .

38

39

40

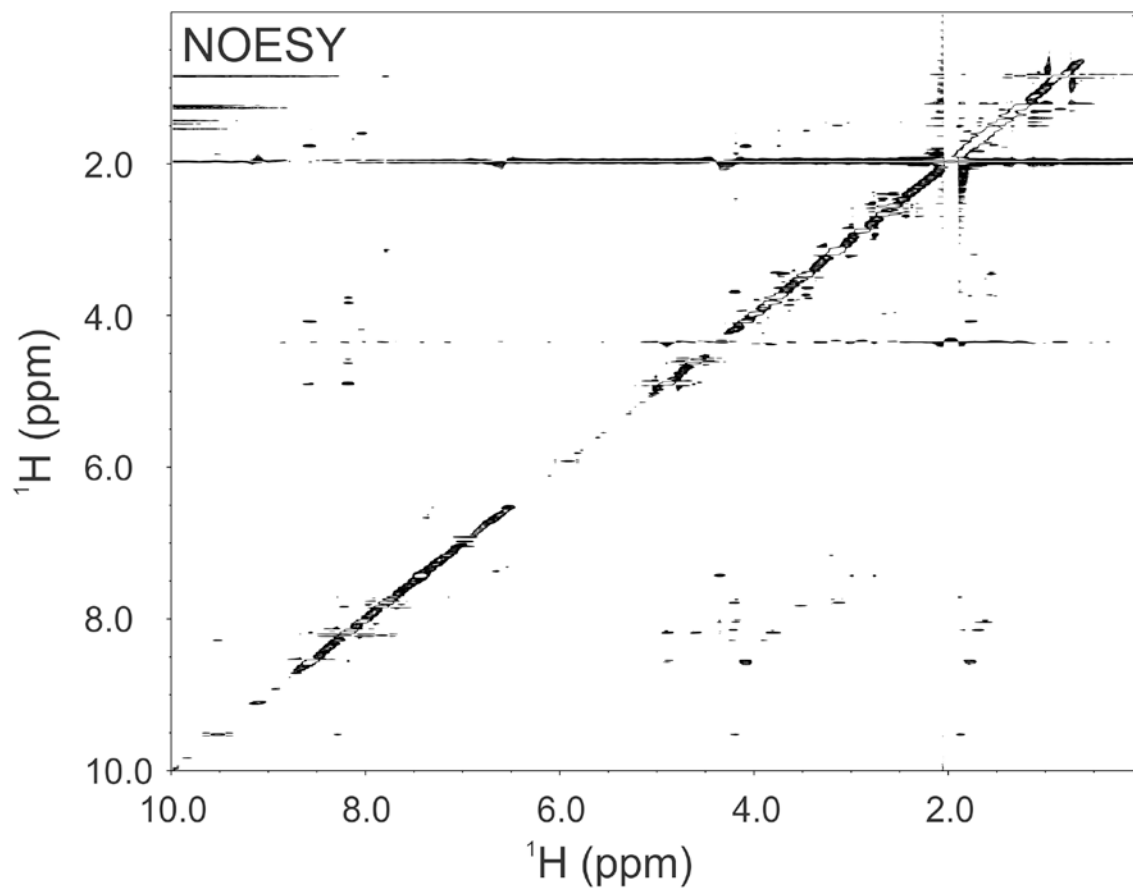

41

42 **Suppl. Fig. 6.** NOESY400 NMR Spectrum of Ornibactin recorded at 600 MHz in (50:50)

43 acetonitrile- $\text{d}_3$ .

44

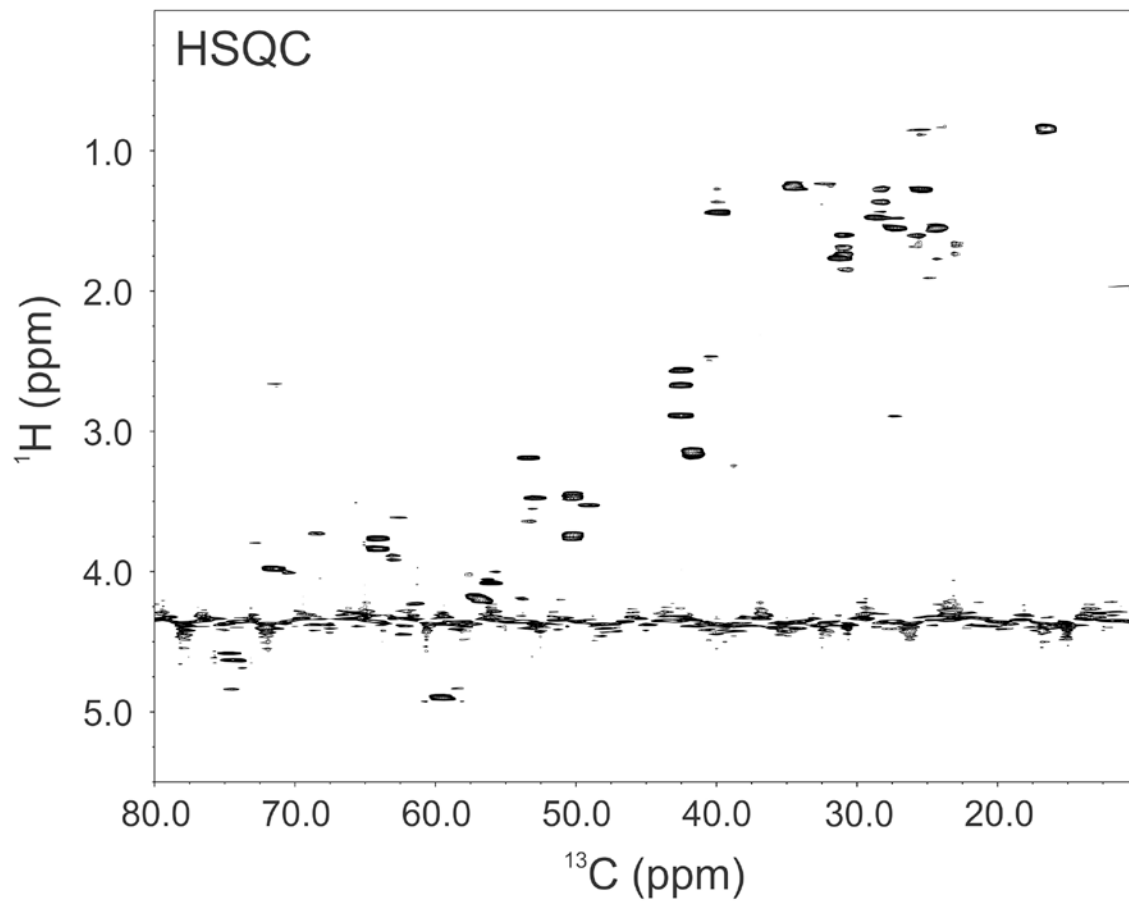

45

46 **Suppl. Fig. 7.**  $^{13}\text{C}$ -HSQC NMR Spectrum of Ornibactin recorded at 600 MHz in (50:50)

47 acetonitrile- $\text{d}_3$ .



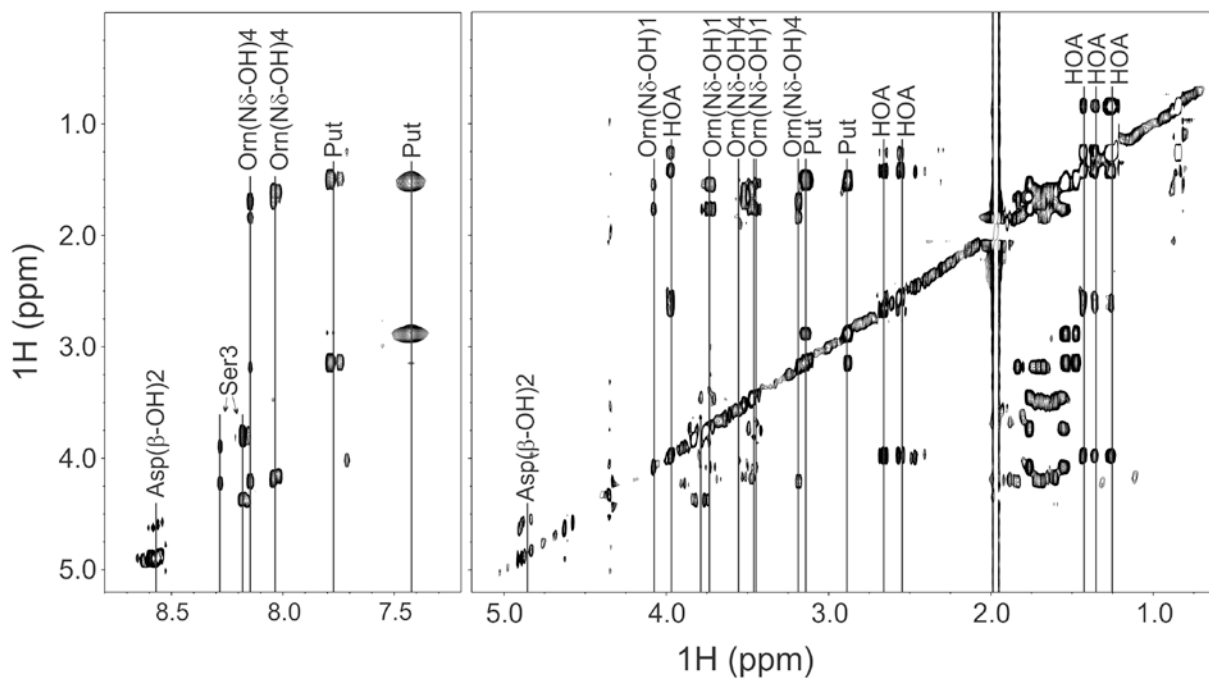

48

49 **Suppl. Fig 8.** TOCSY spin system correlations of the siderophore product. Fingerprint  
 50 region (NH correlations), alpha to side chain correlations and side chain correlations are  
 51 shown. Abbreviation are: ornithine (Orn), putrescine (Put), and hydroxyoctanoic acid  
 52 (HOA).

53

54

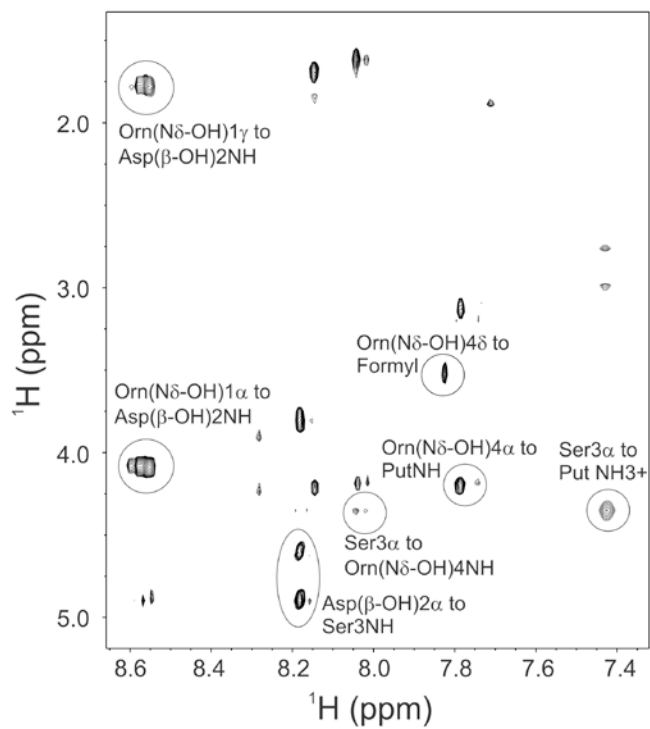

55

56 **Suppl. Fig. 9.** Sequential NOE contacts in ornibactin-F found in NOESY spectra.

57

58

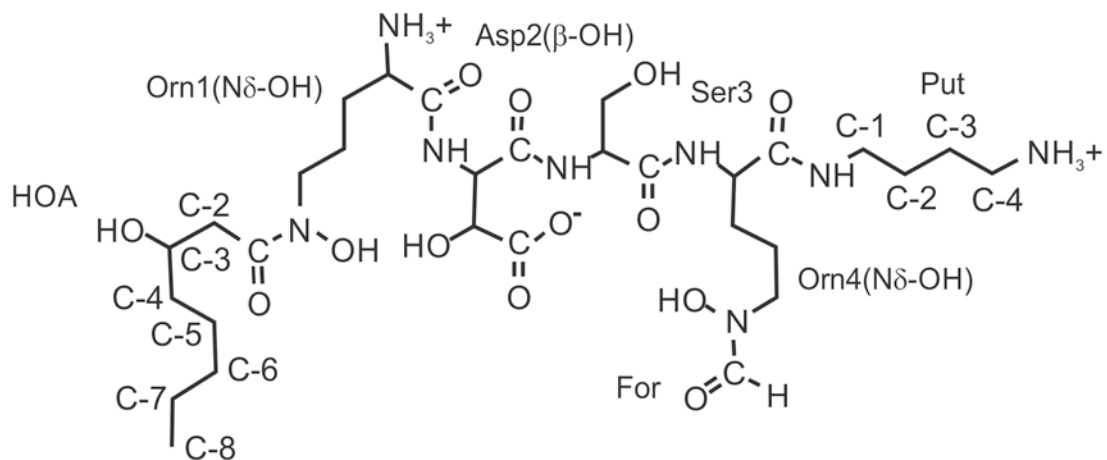

59

60 **Suppl. Fig 10.** Covalent structure of ornibactin-F. The position of each amino acid is  
61 labeled in the tetrapeptide. The location of the 3-hydroxyoctanoic acid (HOA), putrescine  
62 (Put), and Nδ-formyl are demarcated.

63
